1 **Delineating antibody escape from Omicron variants**

2

3

4 Henning Gruell<sup>1</sup>, Kanika Vanshylla<sup>1</sup>, Michael Korenkov<sup>1</sup>, Pinkus Tober-Lau<sup>2</sup>, Matthias  
5 Zehner<sup>1</sup>, Friederike Münn<sup>2</sup>, Hanna Janicki<sup>1</sup>, Max Augustin<sup>3</sup>, Philipp Schommers<sup>1,3</sup>, Leif Erik  
6 Sander<sup>2</sup>, Florian Kurth<sup>2,4</sup>, Christoph Kreer<sup>1</sup>, Florian Klein<sup>1,5,6,\*</sup>

7

8

9

10 1 Laboratory of Experimental Immunology, Institute of Virology, Faculty of Medicine and  
11 University Hospital Cologne, University of Cologne, Cologne, Germany

12 2 Department of Infectious Diseases and Respiratory Medicine, Charité-Universitätsmedizin Berlin,  
13 Freie Universität Berlin and Humboldt-Universität zu Berlin, Berlin, Germany

14 3 Department I of Internal Medicine, Faculty of Medicine and University Hospital Cologne, University of  
15 Cologne, Cologne, Germany

16 4 Department of Tropical Medicine, Bernhard Nocht Institute for Tropical Medicine and Department of  
17 Medicine I, University Medical Center Hamburg-Eppendorf, Hamburg, Germany

18 5 German Center for Infection Research (DZIF), Partner site Bonn-Cologne, Cologne, Germany

19 6 Center for Molecular Medicine Cologne (CMMC), University of Cologne, Cologne, Germany

20

21 \* Correspondence should be addressed to [florian.klein@uk-koeln.de](mailto:florian.klein@uk-koeln.de).

## 22 **Summary**

23 SARS-CoV-2-neutralizing antibodies play a critical role for protection and treatment of  
24 COVID-19. Viral antibody evasion therefore threatens essential prophylactic and  
25 therapeutic measures. The high number of mutations in the Omicron BA.1 sublineage  
26 results in markedly reduced neutralization susceptibility. Consistently, Omicron is  
27 associated with lower vaccine effectiveness and a high re-infection rate. Notably, newly  
28 emerging Omicron sublineages (BA.1.1, BA.2) have rapidly become dominant. Here, we  
29 determine polyclonal serum activity against BA.1, BA.1.1 and BA.2 in 50 convalescent or  
30 vaccinated individuals as well as delineate antibody sensitivities on a monoclonal level  
31 using 163 antibodies. Our study reveals a significant but comparable reduction of serum  
32 activity against Omicron sublineages which markedly increases after booster  
33 immunization. However, notable differences in sensitivity to individual antibodies  
34 demonstrate distinct escape patterns of BA.1 and BA.2 that also affect antibodies in  
35 clinical use. The results have strong implications for vaccination strategies and antibody  
36 use in prophylaxis and therapy.

## 37 **Introduction**

38 Following its emergence two years into the COVID-19 pandemic, the Omicron variant of  
39 SARS-CoV-2 has resulted in a global surge of infections (Viana et al., 2022). Although  
40 Omicron is associated with reduced pathogenicity, its high transmissibility poses a  
41 considerable threat to individuals at risk and the public health system (Madhi et al., 2022;  
42 Meng et al., 2022; Shuai et al., 2022). Moreover, high rates of breakthrough infections in  
43 immunized individuals are clinical manifestations of its immune evasive properties  
44 (Altarawneh et al., 2022; Andrews et al., 2022; Madhi et al., 2022; Tseng et al., 2022).  
45 Omicron's marked resistance to neutralizing antibodies induced by vaccination or  
46 previous infection is mediated by a high number of mutations in the spike protein (Cao et  
47 al., 2022; Carreno et al., 2022; Cele et al., 2022; Garcia-Beltran et al., 2022; Gruell et al.,  
48 2022; Hoffmann et al., 2022; Liu et al., 2022; Planas et al., 2022; Schmidt et al., 2022;  
49 VanBlargan et al., 2022). These include mutations that have rendered several therapeutic  
50 monoclonal antibodies ineffective (Gruell et al., 2022; Liu et al., 2022; VanBlargan et al.,  
51 2022). Prolonged vaccine dosing intervals and booster immunizations based on the  
52 ancestral Wu01 strain of SARS-CoV-2 elicit Omicron-neutralizing serum activity (Cheng  
53 et al., 2022; Garcia-Beltran et al., 2022; Gruell et al., 2022; Perez-Then et al., 2022; Schmidt  
54 et al., 2022; Wratil et al., 2022; Zhao et al., 2022). However, serum titers against Omicron  
55 remain lower compared to those against other variants and Omicron breakthrough  
56 infections are frequently observed (Kuhlmann et al., 2022). Most experimental evidence  
57 on the resistance of the Omicron variant to antibody-mediated neutralization is limited to  
58 analyses of the initial BA.1 strain. However, as additional sublineages emerge (Qassim et  
59 al., 2022; Yamasoba et al., 2022), determining their escape properties is of critical  
60 importance to effectively guide preventive and therapeutic measures. Therefore, we

61 determined in detail antibody-mediated neutralization of the prevalent Omicron  
62 sublineages (BA.1, BA.1.1, and BA.2), both on a polyclonal and monoclonal level.

63

## 64 **Results**

65

### 66 **Rapid spread of Omicron sublineages**

67 Compared to the Wu01 strain of SARS-CoV-2, the spike protein of BA.1 differs in 39 amino  
68 acid residues (**Figure 1A**). While recently emerged sublineages of Omicron share several  
69 BA.1 mutations, they differ at various amino acid positions and therefore can alter critical  
70 epitopes (**Figures 1A** and **1B**). For example, the spike protein of sublineage BA.1.1  
71 contains an additional R346K substitution in the receptor-binding domain (RBD) that was  
72 previously observed in the Mu variant of SARS-CoV-2 and has been associated with escape  
73 from neutralizing antibodies (**Figure 1A**) (Greaney et al., 2021). Moreover, BA.2 shares  
74 only 21 (68%) of its 31 spike protein amino acid changes with BA.1 (**Figure 1A**).  
75 Therefore, BA.2 differs considerably from BA.1 and BA.1.1 in both the N-terminal domain  
76 (NTD) and the RBD, regions targeted by the most potent SARS-CoV-2-neutralizing  
77 antibodies (**Figure 1A**). While BA.1 and BA.1.1 dominated the initial surge of Omicron  
78 infections, they have already been outcompeted by BA.2 in numerous countries (**Figure**  
79 **1C**). Therefore, the BA.2 omicron sublineage is likely to dominate the SARS-CoV-2  
80 pandemic in the near future.

81

### 82 **Comparable reduction of serum neutralizing activity against Omicron sublineages**

83 We analyzed serum neutralizing activity using lentivirus-based pseudovirus assays  
84 against the ancestral Wu01 strain as well as BA.1, BA.1.1, and BA.2 Omicron sublineages  
85 (Crawford et al., 2020; Vanshilla et al., 2021). To this end, we collected samples from two

86 longitudinal cohorts of i.) SARS-CoV-2-convalescent individuals ( $n=20$ ) and ii.) vaccinated  
87 health care workers ( $n=30$ ) (**Table S1**) (Hillus et al., 2021; Vanshylla et al., 2021). In both  
88 cohorts, individuals received an mRNA booster immunization (BNT162b2) after a median  
89 of 14 and 9 months following infection or two doses of BNT162b2, respectively.

90 Convalescent individuals had a median age of 51 years (interquartile range [IQR]  
91 35-58) and were diagnosed with mild or asymptomatic SARS-CoV-2 infection. Early post-  
92 infection samples (V1) were collected at a median of 48 days (IQR 35-58) after disease  
93 onset and neutralizing activity was assessed by determining the 50% inhibitory serum  
94 dilutions ( $ID_{50}$ s) (**Figure 2A**). Neutralization of the Wu01 strain was detected in all  
95 samples (100%) obtained early after infection, with individual  $ID_{50}$  values ranging from  
96 16 to 3,200 (geometric mean  $ID_{50}$  [GeoMean $ID_{50}$ ] of 322) (**Figure 2B**). In contrast, serum  
97 activity against Omicron sublineages was strongly reduced and only detectable in 15%,  
98 0%, and 50% for BA.1., BA1.1, and BA.2 respectively (**Figure 2B**). However, following  
99 booster immunization at a median of 33 days (IQR 27-54) in convalescent individuals,  
100 Omicron-neutralizing activity was elicited in all individuals (**Figures 2B, 2C, S1A and**  
101 **S1B**), reaching GeoMean $ID_{50}$ s of 1,688, 1,578, and 2,388 against BA.1, BA.1.1, and BA.2,  
102 respectively (**Figure 2B**).

103 In addition, we determined Omicron sublineage-neutralizing activity induced only  
104 by vaccination (**Figure 2D**). At a median of 28 days (IQR 27-32) after completion of the  
105 initial two-dose course of BNT162b2 (V1), Wu01-neutralizing serum activity was  
106 detected in all 30 individuals with a GeoMean $ID_{50}$  of 585 (**Figure 2E**). Although Omicron  
107 sublineage-neutralization was detectable in 43-73% of vaccinated individuals,  
108 GeoMean $ID_{50}$ s against BA.1, BA.1.1., and BA.2 were low at 11, 8, and 15, respectively  
109 (**Figure 2E**). Follow-up samples obtained at a median of 29 days (IQR 26-35) after booster  
110 immunization showed 8-fold higher activity against Wu01 (GeoMean $ID_{50}$  of 4,817) and

111 strongly increased Omicron activity in all individuals with GeoMeanID<sub>50</sub>s of 648 against  
112 BA.1, 557 against BA.1.1, and 592 against BA.2 (**Figures 2E, S1C, and S1D**). We conclude  
113 that booster immunizations are critical to elicit neutralizing serum activity against all  
114 prevalent Omicron sublineages in vaccinated as well as convalescent individuals. Notably,  
115 despite the differences in the spike proteins, Omicron sublineages were similarly affected  
116 on the level of serum neutralization.

117

### 118 **Dissecting viral escape of Omicron sublineages**

119 To decode Omicron escape from neutralizing antibodies, we produced and tested 158  
120 monoclonal antibodies isolated from SARS-CoV-2-convalescent individuals against all  
121 Omicron sublineages. These included 67 randomly selected antibodies from the CoV-  
122 AbDab (Raybould et al., 2021), 79 antibodies isolated in our previous work (Kreer et al.,  
123 2020; Vanshylla et al., 2022), as well as 12 clinically evaluated antibodies. In total, this  
124 antibody panel originated from at least 43 different individuals out of 19 independent  
125 studies (**Figure 3A, Table S2**). The selection covered a broad spectrum of diverse SARS-  
126 CoV-2 neutralizing antibodies encompassing 92 V<sub>H</sub>/V<sub>L</sub> combinations. Most of these  
127 antibodies targeted the RBD (96.8 %) and included previously described public  
128 clonotypes such as the V<sub>H</sub>3-53/3-66 subgroup (**Figure 3A**).

129 While all antibodies neutralized the Wu01 strain, only 18%, 17%, and 22%  
130 remained active against BA.1, BA.1.1, and BA.2, respectively (**Figure 3B**). Moreover,  
131 neutralization against Omicron sublineages was overall lower with GeoMeanIC<sub>50</sub>s of  
132 0.431 (BA.1), 0.506 (BA.1.1), and 0.178 (BA.2) compared to Wu-01-neutralizing  
133 antibodies (GeoMeanIC<sub>50</sub> of 0.030 µg/mL; **Figure 3C**). However, our analysis identified a  
134 small number of antibodies with high potency against all Omicron sublineages, including  
135 antibodies isolated from individuals with outstanding serum activity (Vanshylla et al.,

2022). For example, antibodies R207-2F11 and R568-1G9 both neutralized BA.1, BA.1.1, and BA.2 with  $IC_{50}$ s  $<0.01 \mu\text{g/ml}$  (**Table S2**). Notably, antibodies maintaining Omicron-neutralizing activity carried a modest but significantly higher (5.2 vs. 6.9) number of  $V_H$  amino acid mutations ( $p=0.002$ ), suggesting that a higher sequence diversification might be favorable for Omicron neutralization (**Figure S2**). Importantly, while antibody neutralization strongly correlated between BA.1 and BA.1.1 ( $r_s=0.858$ ), a more divergent neutralization profile was observed when comparing BA.1 and BA.2 ( $r_s=0.763$ ; **Figures 3D and 3E**). Based on the analysis of the sublineage neutralization profiles, two prevalent classes of Omicron-neutralizing antibodies became apparent: i.) antibodies with comparable activity against BA.1 and BA.2 lineages (72.5% of antibodies), and ii.) antibodies with higher potency against BA.2 compared to BA.1 (25%) (**Figures 3E, 3F, and 3G**). While only a single (2.5%) out of the 40 Omicron-neutralizing antibodies showed  $>10$ -fold higher activity against BA.1 than BA.2, 10 out of 40 antibodies showed a 1.1 to 3.9  $\log_{10}$ -fold higher potency against BA.2 (**Figure 3G**). This indicates that based on the antibody panel tested, immune escape of BA.2 was less pronounced when compared to BA.1 and BA.1.1.

Finally, antibody responses against SARS-CoV-2 have previously been demonstrated to be highly convergent across individuals by the identification of several public clonotypes, which are conserved in terms of sequence characteristics and mechanisms of neutralization (Barnes et al., 2020; Nielsen et al., 2020; Robbiani et al., 2020; Yuan et al., 2020). Among the analyzed antibody panel, we identified 18 sequences from 11 individuals that could be assigned to a prominent  $V_H3-53/3-66|V_K1-9$  clonotype (**Figure 3H**) (Cao et al., 2020; Vanshylla et al., 2022; Zhang et al., 2021). Interestingly, although these antibodies are highly conserved on a sequence level, they substantially differed in their Omicron neutralizing capacity (**Figure 3H**). For example, antibodies

161 R207-1C4 and R568-2G5 showed similar neutralizing activity against Wu01 and harbor  
162 eight amino acid mutations in their V<sub>H</sub> gene segment (without CDRH3) of which five are  
163 at the same position and three are identical. However, R207-1C4 was not capable of  
164 neutralizing any Omicron variant, while R568-2G5 retained neutralizing activity against  
165 all variants. Notably, another member of this clonotype, C140, which has the identical  
166 CDRH3 motif as R568-2G5, did not neutralize any Omicron variant. These results indicate  
167 that minimal differences in antibody sequence characteristics can tip the scale between  
168 Omicron neutralization and resistance.

169 We conclude that the majority of Wu01-neutralizing antibodies lose activity  
170 against Omicron sublineages. While most BA.1-neutralizing antibodies were reactive  
171 against BA.1.1 and BA.2, the subset of antibodies with Omicron-neutralizing potency  
172 restricted towards BA.2 indicates differences in sublineage antigenicity. Moreover, the  
173 higher rate of BA.2- compared to BA.1-neutralizing monoclonal antibodies in our panel  
174 suggests that the BA.2 spike protein incorporates fewer features associated with  
175 resistance.

176

### 177 **Impact of Omicron sublineages on clinical monoclonal antibodies**

178 SARS-CoV-2-neutralizing monoclonal antibodies can reduce morbidity and mortality in  
179 infected individuals. Moreover, they are critical for passive immunization to protect  
180 individuals that do not mount an adequate immune response upon vaccination (Cohen et  
181 al., 2021; Corti et al., 2021; Dougan et al., 2021; Group, 2022; Gupta et al., 2021; O'Brien  
182 et al., 2021; Weinreich et al., 2021). To determine how spike protein mutations of Omicron  
183 sublineages affect antibodies in clinical use, we analyzed 9 monoclonal antibodies that  
184 received authorization for clinical use (**Figure 4A**) and 9 that are advanced in clinical  
185 development (**Figure S3**). All tested antibodies targeted the RBD of the SARS-CoV-2 spike



186 protein and were tested in parallel against Wu01 and the Omicron sublineages (**Figure**  
187 **4B**).

188 Most antibodies showed highly potent neutralizing activity against Wu01 with  
189  $IC_{50}$ s below 0.005  $\mu$ g/ml (**Figure 4B**). Less potent and incomplete Wu01-neutralizing  
190 activity was observed for sotrovimab, which is consistent with previous reports showing  
191 reduced activity against pseudoviruses lacking the dominant D614G spike mutation  
192 (**Figure 4A**) (Liu et al., 2021; Weissman et al., 2021). In contrast to the high Wu01 activity,  
193 only 5 (28%) out of the 18 tested antibodies neutralized BA.1 with  $IC_{50}$ s <10  $\mu$ g/ml.  
194 Moreover, in 2 out of these 5 antibodies, neutralizing activity was decreased by >2  $\log_{10}$   
195 against BA.1 relative to Wu01 (**Figure 4B**). While the antibody neutralization profile  
196 against the BA.1.1 lineage was generally similar to that of BA.1, a few differences were  
197 detected. For example, DZIF-10c neutralized BA.1 with an  $IC_{50}$  of 0.046  $\mu$ g/ml but  
198 completely lost activity against BA.1.1 (**Figure 4B**). Although the number of antibodies in  
199 clinical use with neutralizing activity against BA.2 remained small (5 out 18, 28%), the  
200 neutralization profile of BA.2 differed from that of BA.1 and BA.1.1 (**Figure 4B**). For  
201 example, antibody COV2-2130 (cilgavimab) neutralized BA.2 with high potency ( $IC_{50}$  of  
202 0.008  $\mu$ g/ml) that was similar to its activity against Wu01 and >800-fold higher than  
203 against BA.1 and BA.1.1 (**Figures 4A and 4B**). In addition, while antibody imdevimab  
204 showed no appreciable activity against BA.1 and BA.1.1, neutralization of BA.2 was  
205 detectable at low levels (**Figures 4A and 4B**). Out of all clinical antibodies tested, the  
206 recently authorized LY-CoV1404 (bebtelovimab) showed the highest levels of  
207 neutralizing activity against all Omicron sublineages (**Figures 4A and 4B**).

208 We conclude that the prevalent Omicron sublineages are resistant to most  
209 monoclonal antibodies in clinical use and/or under investigation. Omicron sensitivity to  
210 these antibodies can, however, strongly differ on the sublineage level. Selection of

211 monoclonal antibodies for treatment or prevention of Omicron infection should therefore  
212 take sublineage identification and/or epidemiology into account.

213

## 214 **Discussion**

215 Neutralizing antibody-mediated immunity is a critical component of prophylactic and  
216 therapeutic measures against SARS-CoV-2 infection (Corti et al., 2021; Feng et al., 2021;  
217 Khoury et al., 2021). The COVID-19 pandemic has been characterized by ongoing viral  
218 evolution and periodic emergence of dominant variants in the context of increasing levels  
219 of population immunity that can drive selection of antibody resistance (Harvey et al.,  
220 2021). Soon after its appearance and explosive spread, considerable immune evasion of  
221 the highly mutated BA.1 sublineage of Omicron was confirmed both experimentally and  
222 clinically (Altarawneh et al., 2022; Andrews et al., 2022; Cao et al., 2022; Carreno et al.,  
223 2022; Cele et al., 2022; Garcia-Beltran et al., 2022; Gruell et al., 2022; Hoffmann et al.,  
224 2022; Liu et al., 2022; Madhi et al., 2022; Planas et al., 2022; Schmidt et al., 2022; Tseng et  
225 al., 2022; VanBlargan et al., 2022). However, novel Omicron sublineages with differing  
226 spike proteins have since become increasingly prevalent, suggesting higher immune  
227 escape and/or higher transmissibility (Lyngse et al., 2022; Qassim et al., 2022; Yamasoba  
228 et al., 2022). Establishing the impact of the new Omicron sublineages on polyclonal and  
229 monoclonal immunity is therefore critical to guide antibody-mediated strategies for  
230 prevention and treatment.

231 Our results demonstrate that Wu01-based mRNA vaccine boosters are effective in  
232 eliciting activity against the Omicron sublineages and result in comparable neutralizing  
233 titers against BA.1, BA.1.1, and BA.2. Although neutralizing activity against Omicron was  
234 considerably lower than against the ancestral strain, booster immunizations will  
235 therefore continue to be a critical component of vaccination strategies. In addition, our

236 analyses of a large antibody panel revealed similarities and differences in the sensitivity  
237 of Omicron sublineages to antibodies isolated from SARS-CoV-2-convalescent individuals.  
238 While the resistance profiles of BA.1 and BA.1.1 were largely overlapping, a substantial  
239 fraction of antibodies with poor or no BA.1/BA.1.1-neutralizing activity showed high  
240 activity against BA.2. Therapeutic monoclonal antibodies authorized for prevention or  
241 treatment of SARS-CoV-2 infection were differentially affected, with some showing  
242 increased and some showing reduced activity against BA.2 compared to BA.1, confirming  
243 similar observations (Iketani et al., 2022). As the majority of tested antibodies failed to  
244 neutralize any of the Omicron sublineages, highly potent antibodies identified by our  
245 analysis may provide novel options for treatment and prevention in the Omicron era.

246 Our observations of higher pre-boost activity against BA.2, comparable  
247 neutralization titers after booster immunization, as well the higher fraction of BA.2- than  
248 BA.1-neutralizing monoclonal antibodies isolated from convalescent individuals suggest  
249 that BA.2 overall does not have higher levels of antibody escape compared to BA.1.  
250 Outcompetition of BA.1 by BA.2 therefore appears to be driven rather by higher  
251 transmissibility and/or other virological characteristics than by immune evasion.  
252 However, as the rapid emergence of the highly resistant Omicron variant illustrated the  
253 challenges posed by viral evolution, continuous genomic surveillance and assessments of  
254 viral sensitivity will be critical for informing antibody-based prophylactic and therapeutic  
255 measures.

256

## 257 **Acknowledgments**

258 We are grateful to all study participants for their dedication to our research. We thank F.  
259 Dewald, L. Gieselmann, B. Kurt, C. Lehmann, P. Mayer, N. Riet, S. Salomon, M. Schlotz, R.  
260 Schröder, R. Stumpf and H. Wüstenberg, as well as the members of the EICOV/COVIM

261 Study Group (Y. Ahlgrimm, L. Bardtke, K. Behn, N. Bethke, H. Bias, D. Briesemeister, C.  
262 Conrad, V. M. Corman, C. Dang-Heine, S. Dieckmann, C. Eroglu, D. Frey, J.-A. Gabelich, J.  
263 Gerdes, U. Gläser, A. Hetey, L. Hasler, E. T. Helbig, D. Hillus, W. Hirst, A. Horn, C. Hülso, S.  
264 Jentsch, C. von Kalle, L. Kegel, A. Krannich, W. Koch, P. Kopankiewicz, P. Kroneberg, H. Le,  
265 L. J. Lippert, C. Lüttke, P. de Macedo Gomes, B. Maeß, C. Matthaiou, J. Michel, A. Nitsche, A.-  
266 M. Ollech, C. Peiser, A. Pioch, C. Pley, K. Pohl, C. Rubisch, L. Ruby, A. Sanchez Rezza, I.  
267 Schellenberger, V. Schenkel, J. Schlesinger, S. Schmidt, G. Schwanitz, T. Schwarz, J. Seybold,  
268 A. Solarek, A. Stege, S. Steinbrecher, P. Stubbemann, C. Thibeault, and D. Treue) for sample  
269 acquisition and processing; L. Buchholz and M. Wunsch for help with antibody production  
270 and preparation; and J.J. Malin for providing clinical antibody stocks. We thank all  
271 laboratories obtaining and submitting SARS-CoV-2 sequencing information to GISAID for  
272 facilitating rapid analyses of global variant distributions. This work was supported by  
273 grants from COVIM: NaFoUniMedCovid19 (FKZ: 01KX2021) (to L.E.S. and F. Klein), the  
274 Federal Institute for Drugs and Medical Devices (V-2021.3 / 1503\_68403 / 2021–2022)  
275 (to L.E.S. and F. Kurth), the German Center for Infection Research (DZIF) (to F. Klein), and  
276 the Deutsche Forschungsgemeinschaft (DFG) CRC1310 (to C.K. and F. Klein).

277

## 278 **Author contributions**

279 Conceptualization, H.G., K.V., C.K., and F. Klein; methodology, H.G., K.V., L.E.S., F. Kurth, C.K.,  
280 and F. Klein; investigation, H.G. and K.V.; resources, P.T-L., M.K., M.Z., F.M., H.J., M.A., and  
281 P.S.; formal analysis, H.G., K.V., and C.K.; writing-original draft, H.G., K.V., C.K., and F. Klein;  
282 writing-review and editing, M.K., P.T-L., and F. Kurth; visualization, H.G., K.V., C.K., and F.  
283 Klein; supervision, L.E.S., F. Kurth, and F. Klein; funding acquisition, L.E.S., F. Kurth, and F.  
284 Klein.

285

286 **Declaration of interests**

287 H.G., K.V., M.Z., C.K., and F. Klein are listed as inventors on patent applications on SARS-  
288 CoV-2-neutralizing antibodies encompassing aspects of this work filed by the University  
289 of Cologne.

290

291 **Figure legends**

292

293 **Figure 1. Omicron sublineage differences.**

294 **(A)** Spike amino acid changes in the BA.1, BA.1.1, and BA.2 Omicron sublineages relative  
295 to Wu01. **(B)** Locations of changed amino acids in Omicron sublineages highlighted on the  
296 SARS-CoV-2 spike (PDB: 6XR8). Representations on the right show RBD and NTD outlined  
297 in black. Changes exclusive to BA.2 are indicated in dark red (visible on surface) and light  
298 red (not visible). In **(A)** and **(B)**, mutations shared between BA.1 and BA.1.1 are shown in  
299 orange, mutations shared between BA.1, BA.1.1 and BA.2 are shown in blue, the R346K  
300 mutation exclusive to BA.1.1 is shown in green, and mutations exclusive to BA.2 are  
301 shown in red. **(C)** Proportion of sequences submitted to the GISAID SARS-CoV-2 database  
302 per variant and week (accessed on April 2, 2022). NTD, N-terminal domain; RBD,  
303 receptor-binding domain; PDB, Protein Data Bank.

304

305 **Figure 2. Omicron sublineage-neutralizing serum activity in vaccinated and**  
306 **convalescent individuals.**

307 **(A)** Study scheme in COVID-19-convalescent individuals. Samples were collected after  
308 infection occurring between February and April, 2020 (V1), and after a BNT162b2  
309 booster immunization (V2). **(B)** Fifty-percent inhibitory serum dilutions (ID<sub>50</sub>s) against  
310 Wu01, BA.1, BA.1.1, and BA.2 determined by pseudovirus neutralization assays in

311 convalescent individuals. Bars indicate geometric mean  $ID_{50}$ s with 95% confidence  
312 intervals (CIs) at V1 (left) and V2 (right). Numbers indicate geometric mean  $ID_{50}$ s and  
313 percentage of individuals with detectable neutralizing activity ( $ID_{50} > 10$ ) in parentheses.  
314 **(C)** Correlation plots of  $\log_{10}$  serum  $ID_{50}$ s against Wu01 (top) and BA.1 (bottom) versus  
315 BA.2 at V2 in convalescent individuals.  $r_s$  indicates Spearman's rank correlation  
316 coefficients. **(D)** Study scheme in vaccinated individuals. Samples were collected after the  
317 second dose of BNT162b2 (V1) and after the third dose of BNT162b2 (V2). **(E)** Serum  
318  $ID_{50}$ s against Wu01, BA.1, BA.1.1, and BA.2 determined by pseudovirus neutralization  
319 assays in vaccinated individuals. Bars indicate geometric mean  $ID_{50}$ s with 95% CIs at V1  
320 (left) and V2 (right). Numbers indicate geometric mean  $ID_{50}$ s and percentage of  
321 individuals with detectable neutralizing activity ( $ID_{50} > 10$ ) in parentheses. **(F)** Correlation  
322 plots of  $\log_{10}$  serum  $ID_{50}$ s against Wu01 (top) and BA.1 (bottom) versus BA.2 at V2 in  
323 vaccinated individuals.  $r_s$  indicates Spearman's rank correlation coefficients. In **(B)** and  
324 **(E)**,  $ID_{50}$ s below the lower limit of quantification (LLOQ,  $ID_{50}$  of 10; indicated by black  
325 dotted lines) were imputed to  $\frac{1}{2}$  LLOQ ( $ID_{50}=5$ ). In **(B)** and **(C)**,  $ID_{50}$ s above the upper  
326 limit of quantification (21,870) were imputed to 21,871.

327

328 **Figure 3. Determining Omicron sublineage immune escape using monoclonal**  
329 **antibodies.**

330 **(A)** SARS-CoV-2-neutralizing monoclonal antibodies ( $n=158$ ) derived from 19 studies and  
331 isolated from  $\geq 43$  convalescent individuals were analyzed. Bar charts indicate number of  
332 antibodies per heavy chain variable gene segment ( $V_H$ ), amino acid (aa) length of the  
333 heavy chain complementarity-determining region 3 (CDRH3), and number of  $V_H$  aa  
334 mutations relative to the  $V_H$  germline gene. Pie chart indicates antibody epitopes with  
335 slice sizes proportional to the number of antibodies. **(B)** Fraction of monoclonal

336 antibodies neutralizing ( $IC_{50} < 10 \mu\text{g/ml}$ ) Wu01 (green), BA.1 (light red), BA.1.1 (dark  
337 red), and BA.2 (blue) in pseudovirus neutralization assay. **(C)**  $IC_{50}$ s of antibodies with  
338 neutralizing activity ( $IC_{50} < 10 \mu\text{g/ml}$ ) against the individual variants (Wu01,  $n=158$ ; BA.1,  
339  $n=29$ ; BA.1.1,  $n=27$ ; BA.2,  $n=34$ ). Bars depict geometric mean  $IC_{50}$ s and dotted line  
340 indicates lower limit of quantification (LLOQ,  $0.005 \mu\text{g/ml}$ ). **(D)** Spider plot of  $IC_{50}$ s for all  
341 antibodies against Wu01, BA.1, BA.1.1, and BA.2. Antibodies are sorted arbitrarily but  
342 equally for each virus. **(E)** Correlation plots of  $IC_{50}$ s of all antibodies against BA.1.1 (left)  
343 and BA.2 (right) versus BA.1. Colors indicate epitopes as in **(A)**. Dashed lines represent  
344 identity lines and dotted lines indicate limits of quantification. **(F)** Bar charts of antibodies  
345 with neutralizing activity ( $IC_{50} < 10 \mu\text{g/ml}$ ) against any Omicron sublineage ( $n=40$ ).  
346 Antibodies in each chart are sorted by BA.1-neutralizing activity (black outline) and bars  
347 show  $IC_{50}$ s against indicated sublineages. Dotted lines show LLOQ ( $0.005 \mu\text{g/ml}$ ) and  
348 upper limit of quantification (ULOQ;  $10 \mu\text{g/ml}$ ). **(G)** Ratio ( $\log_{10}$ ) of  $IC_{50}$ s against BA.1 and  
349 BA.2 for all neutralizing antibodies with any Omicron sublineage-neutralizing activity  
350 ( $IC_{50} < 10 \mu\text{g/ml}$ ;  $n=40$ ). Ratios  $> 1 \log_{10}$  are highlighted in green and percentage of  
351 antibodies with ratio  $> 1 \log_{10}$  is indicated. In **(E)-(G)**,  $IC_{50} < \text{LLOQ}$  were imputed to  $\frac{1}{2}$  LLOQ  
352 ( $IC_{50}=0.0025$ ) and  $IC_{50}$  values  $> \text{ULOQ}$  were imputed to  $2 \times \text{ULOQ}$  ( $IC_{50}=20$ ). **(H)**  
353 Phylogenetic tree and sequence alignment of antibodies of the  $V_{\text{H}}3-53/3-66|V_{\text{K}}1-9$  public  
354 clonotype. Letters indicate aa mutations relative to the  $V_{\text{H}}$  germline gene. Number of aa  
355 mutations compared to the corresponding germline allele and neutralizing activity  
356 against Wu01, BA.1, BA.1.1, and BA.2 are indicated on the right. Germline  $V_{\text{H}}$  represents  
357 the consensus of all identified germline alleles of depicted antibodies ( $V_{\text{H}}3-53*01$ ,  $V_{\text{H}}3-$   
358  $53*04$ , and  $V_{\text{H}}3-66*01$ ).  
359

360 **Figure 4. Omicron sublineage-neutralizing activity of monoclonal antibodies in**  
361 **clinical use.**

362 **(A)** Dose response curves showing % neutralization of monoclonal antibodies against  
363 Wu01, BA.1, BA.1.1, and BA.2 in pseudovirus neutralization assay. Circles show averages  
364 and error bars indicate standard deviation. Dotted lines indicate 50% neutralization  
365 ( $IC_{50}$ ). **(B)**  $IC_{50}$ s against Wu01, BA.1, BA.1.1, and BA.2 of monoclonal antibodies with  
366 current or previous authorization for clinical use or in clinical development. Symbols  
367 indicate whether clinical products or parental antibodies produced as human IgG1 were  
368 used.

369

370 **Supplementary figure legends**

371

372 **Figure S1. Serum neutralization of Omicron sublineages.**

373 **(A)** Serum  $ID_{50}$ s against Wu01, BA.1, BA.1.1, and BA.2 in the cohort of convalescent  
374 individuals after infection (V1) and BNT162b2 booster immunization (V2) as in **Figure 2**.  
375 Lines connect  $ID_{50}$ s of individual participants at V1 and V2. **(B)** Correlation plots of  $\log_{10}$   
376 serum  $ID_{50}$ s against indicated viruses in convalescent individuals at V2.  $r_s$  indicates  
377 Spearman's rank correlation coefficients. **(C)** Serum  $ID_{50}$ s against Wu01, BA.1, BA.1.1, and  
378 BA.2 in the cohort of BNT162b2-vaccinated individuals after the second (V1) and the  
379 third vaccine dose (V2) as in **Figure 2**. Lines connect  $ID_{50}$ s of individual participants at V1  
380 and V2. **(D)** Correlation plots of  $\log_{10}$  serum  $ID_{50}$ s against indicated viruses in vaccinated  
381 individuals at V2.  $r_s$  indicates Spearman's rank correlation coefficients.

382

383

384



385 **Figure S2. Sequence mutations in Omicron-neutralizing antibodies.**

386 Number of antibody V<sub>H</sub> amino acid mutations compared to V<sub>H</sub> germline sequence for  
387 antibodies not neutralizing (IC<sub>50</sub> >10 µg/ml) any of the Omicron sublineages (left) or  
388 neutralizing at least one of the Omicron sublineages (right). Lines indicate mean and error  
389 bars indicate standard deviation. Statistical significance was determined using a two-  
390 sided Mann-Whitney U test.

391

392 **Figure S3. Omicron sublineage-neutralizing activity of monoclonal antibodies in**  
393 **clinical testing.**

394 Dose response curves showing % neutralization of monoclonal antibodies against  
395 Wu01, BA.1, BA.1.1, and BA.2 in a pseudovirus neutralization assay. Circles show  
396 averages and error bars indicate standard deviation. Dotted lines indicate 50%  
397 neutralization (IC<sub>50</sub>).

398

399 **Supplementary tables**

400 **Table S1:** Study cohorts

401 **Table S2:** Monoclonal antibody panel analyses

402

403 **Methods**

404

405 **Study cohort and sample collection**

406 Serum samples from COVID-19-convalescent individuals were collected at the University  
407 Hospital Cologne under study protocols approved by the ethics committee (EC) of the  
408 Medical Faculty of the University of Cologne (16-054 and 20-1187). Between April and  
409 May, 2020, individuals with a history of SARS-CoV-2 infection confirmed by polymerase

410 chain reaction (documented through a written test certificate or as reported to study  
411 investigators by the participants) were enrolled within eight weeks of symptom onset  
412 and/or diagnosis. As all participants were enrolled early during the pandemic (i.e., prior  
413 to the emergence of variants of concern, as designated by the World Health Organization),  
414 most individuals are likely to have been infected with an early viral strain similar to Wu01.  
415 Participants were followed longitudinally to analyze long-term immunity to SARS-CoV-2.

416 Serum samples from vaccinated individuals were collected under protocols  
417 approved by the EC of Charité - Universitätsmedizin Berlin (EICOV, EA4/245/20) as well  
418 as the EC of the Federal State of Berlin and the Paul Ehrlich Institute (COVIM, EudraCT-  
419 No. 2021-001512-28). Study participation irrespective of medical conditions was offered  
420 to health-care workers vaccinated at the Charité – Universitätsmedizin (Berlin, Germany).  
421 All serum samples were tested for antibodies targeting the SARS-CoV-2 nucleocapsid  
422 using the SeraSpot Anti-SARS-CoV-2 IgG microarray-based immunoassay (Seramun  
423 Diagnostica). Samples from individuals with a history of SARS-CoV-2 infection, a positive  
424 SARS-CoV-2 nucleic acid amplification test (performed at sampling), or detectable anti-  
425 nucleocapsid antibodies were not included in this analysis.

426 All study participants provided written informed consent. Vaccinations in both  
427 cohorts were performed as part of routine care outside of the observational studies.  
428 Selection of participants and samples for analysis was based on receipt of identical  
429 vaccines and comparable sampling time points relative to vaccinations. Serum samples  
430 were collected after centrifugation and stored at -80°C until analysis.

431

### 432 **SARS-CoV-2 pseudovirus constructs**

433 All SARS-CoV-2 spike proteins were expressed using codon-optimized expression  
434 plasmids. Wu01 (EPI\_ISL\_406716) pseudoviruses were produced using an expression

435 plasmid that incorporated a C-terminal deletion of 21 cytoplasmic amino acids that result  
436 in increased pseudovirus titers. Expression plasmids for Omicron sublineage spike  
437 proteins were produced by assembling and cloning codon-optimized overlapping gene  
438 fragments (Thermo Fisher) into the pCDNA3.1/V5-HisTOPO vector (Thermo Fisher)  
439 using the NEBuilder HiFi DNA Assembly Kit (New England Biolabs), and included the full  
440 spike protein amino acid sequences with the following amino acid changes relative to

441 Wu01:

442 BA.1: A67V, Δ69-70, T95I, G142D, Δ143-145, N211I, Δ212, ins215EPE, G339D, S371L,  
443 S373P, S375F, K417N, N440K, G446S, S477N, T478K, E484A, Q493R, G496S, Q498R,  
444 N501Y, Y505H, T547K, D614G, H655Y, N679K, P681H, N764K, D796Y, N856K, Q954H,  
445 N969K, and L981F.

446 BA.1.1: As for BA.1 with an additional R346K mutation.

447 BA.2: T19I, Δ24-26, A27S, A67V, G142D, V213G, G339D, S371F, S373P, S375F, T376A,  
448 D405N, R408S, K417N, N440K, S477N, T478K, E484A, Q493R, Q498R, N501Y, Y505H,  
449 D614G, H655Y, N679K, P681H, N764K, D796Y, Q954H, N969K.

450 All plasmid sequences were verified by sequencing.

451

## 452 **Monoclonal antibodies**

453 Monoclonal antibodies previously isolated in our lab had been obtained by single cell-  
454 sorting of SARS-CoV-2 spike-specific B cells followed by reverse transcription, PCR  
455 amplification and cloning of antibody variable regions (Kreer et al., 2020; Vanshylla et al.,  
456 2022). For monoclonal antibodies derived from the CoV-AbDab (Raybould et al., 2021),  
457 variable region amino acid sequences were reverse translated with the reverse translate  
458 tool from the Sequence Manipulation Suite (Stothard, 2000) using the *Homo sapiens*  
459 codon table obtained from the Codon Usage Database (Nakamura et al., 2000), and

460 sequences were ordered as gene fragments from Integrated DNA Technologies (IDT) with  
461 5' and 3' overhangs. The variable regions were inserted into heavy and light chain  
462 expression plasmids (Tiller et al., 2008) by sequence- and ligation-independent cloning  
463 (SLIC). For antibodies ADG-2, COV2-2130, COV2-2196, COV2-2381, MAD0004J08, and  
464 P2C-1F11, gene fragments based on the nucleotide sequences published in GenBank were  
465 ordered at IDT and cloned as above. For antibodies C135, CT-P59, and LY-CoV1404, gene  
466 fragments based on antibody structures deposited in the Protein Data Bank (accession  
467 nos. 7K8Z, 7CM4, and 7MMO) were ordered at IDT after codon optimization using the IDT  
468 Codon Optimization Tool and cloned as above. For antibodies 47D11, BD-368-2, C144,  
469 and P2B-2F6, amino acid sequences were derived from CoV-AbDaB, corresponding  
470 nucleotide sequences generated and codon-optimized using the IDT Codon Optimization  
471 Tool, and gene fragments cloned as above.

472         Monoclonal antibody production was performed using 293-6E cells (National  
473 Research Council of Canada) by co-transfection of heavy and light chain expression  
474 plasmids using 25 kDa branched polyethylenimine (Sigma-Aldrich). Culture supernatants  
475 were harvested after an incubation period of 6-7 days at 37°C and 6% CO<sub>2</sub> under constant  
476 shaking in FreeStyle Expression Medium supplemented with penicillin (20 U/ml) and  
477 streptomycin (20 µg/ml) (all Thermo Fisher). Clarified cell supernatants were incubated  
478 with Protein G Sepharose 4 FastFlow (Cytiva) overnight at 4°C . After centrifugation,  
479 antibodies bound to Protein G beads were eluted in chromatography columns (Bio-Rad)  
480 using 0.1 M glycine (pH=3.0) and buffered in 1 M Tris (pH=8.0). Buffer exchange to PBS  
481 was performed using centrifugal filter units (Millipore). For antibodies bamlanivimab,  
482 casirivimab, DZIF-10c, etesevimab, imdevimab, and sotrovimab, aliquots from clinical  
483 stocks were used.

484

## 485 **Pseudovirus neutralization assays**

486 Neutralization assays were performed using lentivirus-based pseudoviruses and ACE2-  
487 expressing 293T cells (Crawford et al., 2020; Vanshylla et al., 2021). Pseudovirus particle  
488 production was performed in HEK293T cells by co-transfection of individual expression  
489 plasmids encoding for the SARS-CoV-2 spike protein, HIV-1 Tat, HIV-1 Gag/Pol, HIV-1 Rev,  
490 and luciferase-IRES-ZsGreen using FuGENE 6 Transfection Reagent (Promega). Culture  
491 supernatants were exchanged with fresh medium (high glucose DMEM supplemented  
492 with 2 mM L-glutamine, 100 IU/ml penicillin, 100 µg/ml streptomycin, 1 mM sodium  
493 pyruvate (all Thermo Fisher), and 10% FBS (Sigma-Aldrich)) 24 h post transfection.  
494 Pseudovirus-containing supernatants were harvested between 48-72 h after transfection,  
495 centrifuged, clarified using a 0.45 µm filter, and stored at -80°C. Pseudoviruses were  
496 titrated by infection of 293T-ACE2 cells and luciferase activity was determined after a 48-  
497 hour incubation at 37°C and 5% CO<sub>2</sub> by addition of luciferin/lysis buffer (10 mM MgCl<sub>2</sub>,  
498 0.3 mM ATP, 0.5 mM coenzyme A, 17 mM IGEPAL CA-630 (all Sigma-Aldrich), and 1 mM  
499 D-Luciferin (GoldBio) in Tris-HCL) using a microplate reader (Berthold).

500 Serum samples were heat-inactivated at 56°C for 45 min before use. Three-fold  
501 serial dilutions of serum (starting at 1:10) and monoclonal antibodies (starting at 10  
502 µg/ml) were prepared in culture medium and co-incubated with pseudovirus  
503 supernatants for one hour at 37°C and 5% CO<sub>2</sub> prior to addition of 293T-ACE2 cells.  
504 Following a 48-hour incubation at 37°C and 5% CO<sub>2</sub>, luciferase activity was determined  
505 as described above. Average background relative light units (RLUs) of non-infected cells  
506 were subtracted, and serum ID<sub>50S</sub> and antibody IC<sub>50S</sub> were determined as the serum  
507 dilutions and antibody concentrations resulting in a 50% RLU reduction compared to the  
508 average of virus-infected untreated controls cells using a non-linear fit model plotting an  
509 agonist vs. normalized dose response curve with variable slope using the least squares

510 fitting method in Prism 7.0 (GraphPad). All serum and monoclonal antibody samples were  
511 tested in duplicates. Imputation rules for values outside the limits of quantification are  
512 described below (see Statistical methods).

513

#### 514 **SARS-CoV-2 neutralizing antibody panel and sequence analysis**

515 The panel of 158 SARS-CoV-2-neutralizing monoclonal antibodies isolated from SARS-  
516 CoV-2 convalescent individuals included in the analysis in **Figure 3** is based on 79  
517 antibodies obtained in our previous work (Kreer et al., 2020; Vanshylla et al., 2022), 67  
518 randomly selected (retrieved on January 1, 2021) human SARS-CoV-2-neutralizing  
519 antibodies deposited at CoV-AbDab (Raybould et al., 2021), and 12 antibodies in clinical  
520 use or development. We did not include five of the antibodies in clinical development  
521 shown in **Figure 4** into this analysis, as they were obtained from individuals infected with  
522 SARS-CoV (ADG-2, sotrovimab), from immunized mice harboring human immunoglobulin  
523 gene repertoires (47D11, casirivimab), or using phage display technology that does not  
524 ensure native pairing of antibody heavy and light chains (CT-P59). For antibody DZIF-10c,  
525 the parental antibody (HbnC3t1p1\_F4) was included in the analysis in **Figure 3**, while the  
526 clinical product is included in **Figure 4**.

527       Antibody amino acid sequences were annotated with IgBLASTp (Ye et al., 2013)  
528 based on the IMGT database (Lefranc, 2011). For sequence statistics, top V gene calls were  
529 counted without individual alleles, CDR3 lengths are reported according to the IMGT  
530 numbering system and numbers of  $V_H$  mutations refer to the top V gene call from  
531 IgBLASTp. Phylogenetic analysis of antibodies belonging to the  $V_H3-53/3-66|V_K1-9$  public  
532 clonotype was performed by alignment of amino acid sequences with the MAFFT  
533 algorithm (Kato et al., 2002) via the EMBL-EBI search and sequence analysis tools API  
534 (Madeira et al., 2019) and the Tree Builder tool from Geneious Prime 2020.0.4

535 (Biomatters) using the Jukes-Cantor distance model for tree building with the neighbour-  
536 joining method without resampling. Data aggregation and visualization was performed  
537 with the Python libraries pandas (v1.1.5), NumPy (v1.19.2), SciPy (v1.5.2), Matplotlib  
538 (v3.3.4) with Python (v3.6.8), as well as Microsoft Excel 2011 for Mac (v14.7.3), and  
539 Adobe Illustrator.

540

#### 541 **Visualization of SARS-CoV-2 spike amino acid changes**

542 Amino acid changes relative to the Wu01 spike protein were visualized on a cryo-electron  
543 microscopy 3D-reconstruction of the SARS-CoV-2 spike protein (PDB ID: 6XR8) (Cai et al.,  
544 2020) using ChimeraX (v. 1.3) (Goddard et al., 2018; Pettersen et al., 2021).

545

#### 546 **SARS-CoV-2 variant distribution**

547 GISAID-curated clade and lineage statistics of sequences submitted to the GISAID  
548 database (Elbe and Buckland-Merrett, 2017; Khare et al., 2021; Shu and McCauley, 2017)  
549 were retrieved from GISAID (accessed on April 2, 2022) and frequency of individual  
550 variants was plotted as fraction of all submitted sequences per week and variant.

551

#### 552 **Statistical Methods**

553 For graphical representation and statistical evaluation of serum samples in **Figures 2** and  
554 **S1**, samples that did not achieve 50% inhibition at the lowest tested dilution of 10 (lower  
555 limit of quantification, LLOQ) were imputed to  $\frac{1}{2}$  of the LLOQ ( $ID_{50}=5$ ) and serum samples  
556 with  $ID_{50} > 21,870$  (upper limit of quantification) were imputed to  $ID_{50}=21871$ . For  
557 graphical representation and statistical analysis of monoclonal neutralizing antibodies in  
558 **Figure 3**,  $IC_{50}$  values of antibodies with an  $IC_{50} < 0.005 \mu\text{g/ml}$  (LLOQ) were imputed to  $\frac{1}{2}$   
559 LLOQ ( $IC_{50}=0.0025$ ) and  $IC_{50}$  values  $> 10 \mu\text{g/ml}$  (ULOQ) were imputed to  $2x$  ULOQ ( $IC_{50}=20$

560  $\mu\text{g/ml}$ ). Spearman's rank correlation coefficients were determined using Prism 7.0  
561 (GraphPad; serum samples) or the `spearmanr()` function of the SciPy-package (v 1.5.2)  
562 stats-module (monoclonal antibodies). For the comparison of the number of  $V_H$  amino  
563 acid mutations relative to germline between antibodies neutralizing Wu01 or any  
564 Omicron sublineage, a two-sided Mann-Whitney U test was performed using the  
565 `mannwhitneyu()` function of the SciPy-package (v 1.5.2) stats-module.

566

### 567 **Data and code availability**

568 Requests for data or materials should be directed to the corresponding author and may  
569 be subject to restrictions based on data and privacy protection regulations and/or may  
570 require a Material Transfer Agreement (MTA). The paper does not report original code.

571

### 572 **References**

573 Altarawneh, H.N., Chemaitelly, H., Hasan, M.R., Ayoub, H.H., Qassim, S., AlMukdad, S., Coyle,  
574 P., Yassine, H.M., Al-Khatib, H.A., Benslimane, F.M., et al. (2022). Protection against the  
575 Omicron Variant from Previous SARS-CoV-2 Infection. *N Engl J Med*.

576 Andrews, N., Stowe, J., Kirsebom, F., Toffa, S., Rickeard, T., Gallagher, E., Gower, C., Kall, M.,  
577 Groves, N., O'Connell, A.-M., et al. (2022). Covid-19 Vaccine Effectiveness against the  
578 Omicron (B.1.1.529) Variant. *New England Journal of Medicine*.

579 Barnes, C.O., West, A.P., Jr., Huey-Tubman, K.E., Hoffmann, M.A.G., Sharaf, N.G., Hoffman,  
580 P.R., Koranda, N., Gristick, H.B., Gaebler, C., Muecksch, F., et al. (2020). Structures of Human  
581 Antibodies Bound to SARS-CoV-2 Spike Reveal Common Epitopes and Recurrent Features  
582 of Antibodies. *Cell* 182, 828-842 e816.

583 Cai, Y., Zhang, J., Xiao, T., Peng, H., Sterling, S.M., Walsh, R.M., Jr., Rawson, S., Rits-Volloch,  
584 S., and Chen, B. (2020). Distinct conformational states of SARS-CoV-2 spike protein.  
585 *Science* 369, 1586-1592.

586 Cao, Y., Su, B., Guo, X., Sun, W., Deng, Y., Bao, L., Zhu, Q., Zhang, X., Zheng, Y., Geng, C., et al.  
587 (2020). Potent Neutralizing Antibodies against SARS-CoV-2 Identified by High-  
588 Throughput Single-Cell Sequencing of Convalescent Patients' B Cells. *Cell* 182, 73-84 e16.

589 Cao, Y., Wang, J., Jian, F., Xiao, T., Song, W., Yisimayi, A., Huang, W., Li, Q., Wang, P., An, R.,  
590 et al. (2022). Omicron escapes the majority of existing SARS-CoV-2 neutralizing  
591 antibodies. *Nature* 602, 657-663.



- 592 Carreno, J.M., Alshammery, H., Tcheou, J., Singh, G., Raskin, A.J., Kawabata, H., Sominsky,  
593 L.A., Clark, J.J., Adelsberg, D.C., Bielak, D.A., et al. (2022). Activity of convalescent and  
594 vaccine serum against SARS-CoV-2 Omicron. *Nature* 602, 682-688.
- 595 Cele, S., Jackson, L., Khoury, D.S., Khan, K., Moyo-Gwete, T., Tegally, H., San, J.E., Cromer, D.,  
596 Scheepers, C., Amoako, D.G., et al. (2022). Omicron extensively but incompletely escapes  
597 Pfizer BNT162b2 neutralization. *Nature* 602, 654-656.
- 598 Cheng, S.M.S., Mok, C.K.P., Leung, Y.W.Y., Ng, S.S., Chan, K.C.K., Ko, F.W., Chen, C., Yiu, K.,  
599 Lam, B.H.S., Lau, E.H.Y., et al. (2022). Neutralizing antibodies against the SARS-CoV-2  
600 Omicron variant BA.1 following homologous and heterologous CoronaVac or BNT162b2  
601 vaccination. *Nat Med*.
- 602 Cohen, M.S., Nirula, A., Mulligan, M.J., Novak, R.M., Marovich, M., Yen, C., Stemer, A., Mayer,  
603 S.M., Wohl, D., Brengle, B., et al. (2021). Effect of Bamlanivimab vs Placebo on Incidence of  
604 COVID-19 Among Residents and Staff of Skilled Nursing and Assisted Living Facilities: A  
605 Randomized Clinical Trial. *JAMA* 326, 46-55.
- 606 Corti, D., Purcell, L.A., Snell, G., and Veessler, D. (2021). Tackling COVID-19 with  
607 neutralizing monoclonal antibodies. *Cell* 184, 3086-3108.
- 608 Crawford, K.H.D., Eguia, R., Dingens, A.S., Loes, A.N., Malone, K.D., Wolf, C.R., Chu, H.Y.,  
609 Tortorici, M.A., Veessler, D., Murphy, M., et al. (2020). Protocol and Reagents for  
610 Pseudotyping Lentiviral Particles with SARS-CoV-2 Spike Protein for Neutralization  
611 Assays. *Viruses* 12.
- 612 Dougan, M., Nirula, A., Azizad, M., Mocherla, B., Gottlieb, R.L., Chen, P., Hebert, C., Perry, R.,  
613 Boscia, J., Heller, B., et al. (2021). Bamlanivimab plus Etesevimab in Mild or Moderate  
614 Covid-19. *N Engl J Med* 385, 1382-1392.
- 615 Elbe, S., and Buckland-Merrett, G. (2017). Data, disease and diplomacy: GISAID's  
616 innovative contribution to global health. *Glob Chall* 1, 33-46.
- 617 Feng, S., Phillips, D.J., White, T., Sayal, H., Aley, P.K., Bibi, S., Dold, C., Fuskova, M., Gilbert,  
618 S.C., Hirsch, I., et al. (2021). Correlates of protection against symptomatic and  
619 asymptomatic SARS-CoV-2 infection. *Nat Med* 27, 2032-2040.
- 620 Garcia-Beltran, W.F., St Denis, K.J., Hoelzemer, A., Lam, E.C., Nitido, A.D., Sheehan, M.L.,  
621 Berrios, C., Ofoman, O., Chang, C.C., Hauser, B.M., et al. (2022). mRNA-based COVID-19  
622 vaccine boosters induce neutralizing immunity against SARS-CoV-2 Omicron variant. *Cell*  
623 185, 457-466 e454.
- 624 Goddard, T.D., Huang, C.C., Meng, E.C., Pettersen, E.F., Couch, G.S., Morris, J.H., and Ferrin,  
625 T.E. (2018). UCSF ChimeraX: Meeting modern challenges in visualization and analysis.  
626 *Protein Sci* 27, 14-25.
- 627 Greaney, A.J., Starr, T.N., Barnes, C.O., Weisblum, Y., Schmidt, F., Caskey, M., Gaebler, C.,  
628 Cho, A., Agudelo, M., Finkin, S., et al. (2021). Mapping mutations to the SARS-CoV-2 RBD  
629 that escape binding by different classes of antibodies. *Nat Commun* 12, 4196.

- 630 Group, R.C. (2022). Casirivimab and imdevimab in patients admitted to hospital with  
631 COVID-19 (RECOVERY): a randomised, controlled, open-label, platform trial. *The Lancet*  
632 399, 665-676.
- 633 Gruell, H., Vanshylla, K., Tober-Lau, P., Hillus, D., Schommers, P., Lehmann, C., Kurth, F.,  
634 Sander, L.E., and Klein, F. (2022). mRNA booster immunization elicits potent neutralizing  
635 serum activity against the SARS-CoV-2 Omicron variant. *Nat Med*.
- 636 Gupta, A., Gonzalez-Rojas, Y., Juarez, E., Crespo Casal, M., Moya, J., Falci, D.R., Sarkis, E.,  
637 Solis, J., Zheng, H., Scott, N., et al. (2021). Early Treatment for Covid-19 with SARS-CoV-2  
638 Neutralizing Antibody Sotrovimab. *N Engl J Med* 385, 1941-1950.
- 639 Harvey, W.T., Carabelli, A.M., Jackson, B., Gupta, R.K., Thomson, E.C., Harrison, E.M.,  
640 Ludden, C., Reeve, R., Rambaut, A., Consortium, C.-G.U., et al. (2021). SARS-CoV-2 variants,  
641 spike mutations and immune escape. *Nat Rev Microbiol* 19, 409-424.
- 642 Hillus, D., Schwarz, T., Tober-Lau, P., Vanshylla, K., Hastor, H., Thibeault, C., Jentsch, S.,  
643 Helbig, E.T., Lippert, L.J., Tscheak, P., et al. (2021). Safety, reactogenicity, and  
644 immunogenicity of homologous and heterologous prime-boost immunisation with  
645 ChAdOx1 nCoV-19 and BNT162b2: a prospective cohort study. *The Lancet Respiratory*  
646 *Medicine* 9, 1255-1265.
- 647 Hoffmann, M., Kruger, N., Schulz, S., Cossmann, A., Rocha, C., Kempf, A., Nehlmeier, I.,  
648 Graichen, L., Moldenhauer, A.S., Winkler, M.S., et al. (2022). The Omicron variant is highly  
649 resistant against antibody-mediated neutralization: Implications for control of the COVID-  
650 19 pandemic. *Cell* 185, 447-456 e411.
- 651 Iketani, S., Liu, L., Guo, Y., Liu, L., Chan, J.F.W., Huang, Y., Wang, M., Luo, Y., Yu, J., Chu, H., et  
652 al. (2022). Antibody evasion properties of SARS-CoV-2 Omicron sublineages. *Nature*.
- 653 Katoh, K., Misawa, K., Kuma, K., and Miyata, T. (2002). MAFFT: a novel method for rapid  
654 multiple sequence alignment based on fast Fourier transform. *Nucleic Acids Res* 30, 3059-  
655 3066.
- 656 Khare, S., Gurry, C., Freitas, L., Schultz, M.B., Bach, G., Diallo, A., Akite, N., Ho, J., Lee, R.T.,  
657 Yeo, W., et al. (2021). GISAID's Role in Pandemic Response. *China CDC Wkly* 3, 1049-1051.
- 658 Khoury, D.S., Cromer, D., Reynaldi, A., Schlub, T.E., Wheatley, A.K., Juno, J.A., Subbarao, K.,  
659 Kent, S.J., Triccas, J.A., and Davenport, M.P. (2021). Neutralizing antibody levels are highly  
660 predictive of immune protection from symptomatic SARS-CoV-2 infection. *Nat Med* 27,  
661 1205-1211.
- 662 Kreer, C., Zehner, M., Weber, T., Ercanoglu, M.S., Gieselmann, L., Rohde, C., Halwe, S.,  
663 Korenkov, M., Schommers, P., Vanshylla, K., et al. (2020). Longitudinal Isolation of Potent  
664 Near-Germline SARS-CoV-2-Neutralizing Antibodies from COVID-19 Patients. *Cell* 182,  
665 843-854 e812.
- 666 Kuhlmann, C., Mayer, C.K., Claassen, M., Maponga, T., Burgers, W.A., Keeton, R., Riou, C.,  
667 Sutherland, A.D., Suliman, T., Shaw, M.L., et al. (2022). Breakthrough infections with SARS-  
668 CoV-2 omicron despite mRNA vaccine booster dose. *The Lancet* 399, 625-626.

- 669 Lefranc, M.P. (2011). IMGT, the International ImMunoGeneTics Information System. Cold  
670 Spring Harb Protoc 2011, 595-603.
- 671 Liu, C., Ginn, H.M., Dejnirattisai, W., Supasa, P., Wang, B., Tuekprakhon, A., Nutalai, R., Zhou,  
672 D., Mentzer, A.J., Zhao, Y., et al. (2021). Reduced neutralization of SARS-CoV-2 B.1.617 by  
673 vaccine and convalescent serum. *Cell* 184, 4220-4236 e4213.
- 674 Liu, L., Iketani, S., Guo, Y., Chan, J.F., Wang, M., Liu, L., Luo, Y., Chu, H., Huang, Y., Nair, M.S.,  
675 et al. (2022). Striking antibody evasion manifested by the Omicron variant of SARS-CoV-  
676 2. *Nature* 602, 676-681.
- 677 Lyngse, F.P., Kirkeby, C.T., Denwood, M., Christiansen, L.E., Mølbak, K., Møller, C.H., Skov,  
678 R.L., Krause, T.G., Rasmussen, M., Sieber, R.N., et al. (2022). Transmission of SARS-CoV-2  
679 Omicron VOC subvariants BA.1 and BA.2: Evidence from Danish Households. *medRxiv*.
- 680 Madeira, F., Park, Y.M., Lee, J., Buso, N., Gur, T., Madhusoodanan, N., Basutkar, P., Tivey,  
681 A.R.N., Potter, S.C., Finn, R.D., et al. (2019). The EMBL-EBI search and sequence analysis  
682 tools APIs in 2019. *Nucleic Acids Res* 47, W636-W641.
- 683 Madhi, S.A., Kwatra, G., Myers, J.E., Jassat, W., Dhar, N., Mukendi, C.K., Nana, A.J., Blumberg,  
684 L., Welch, R., Ngorima-Mabhena, N., et al. (2022). Population Immunity and Covid-19  
685 Severity with Omicron Variant in South Africa. *N Engl J Med*.
- 686 Meng, B., Abdullahi, A., Ferreira, I., Goonawardane, N., Saito, A., Kimura, I., Yamasoba, D.,  
687 Gerber, P.P., Fatihi, S., Rathore, S., et al. (2022). Altered TMPRSS2 usage by SARS-CoV-2  
688 Omicron impacts tropism and fusogenicity. *Nature*.
- 689 Nakamura, Y., Gojobori, T., and Ikemura, T. (2000). Codon usage tabulated from  
690 international DNA sequence databases: status for the year 2000. *Nucleic Acids Res* 28,  
691 292.
- 692 Nielsen, S.C.A., Yang, F., Jackson, K.J.L., Hoh, R.A., Roltgen, K., Jean, G.H., Stevens, B.A., Lee,  
693 J.Y., Rustagi, A., Rogers, A.J., et al. (2020). Human B Cell Clonal Expansion and Convergent  
694 Antibody Responses to SARS-CoV-2. *Cell Host Microbe* 28, 516-525 e515.
- 695 O'Brien, M.P., Forleo-Neto, E., Musser, B.J., Isa, F., Chan, K.C., Sarkar, N., Bar, K.J., Barnabas,  
696 R.V., Barouch, D.H., Cohen, M.S., et al. (2021). Subcutaneous REGEN-COV Antibody  
697 Combination to Prevent Covid-19. *N Engl J Med* 385, 1184-1195.
- 698 Perez-Then, E., Lucas, C., Monteiro, V.S., Miric, M., Brache, V., Cochon, L., Vogels, C.B.F.,  
699 Malik, A.A., De la Cruz, E., Jorge, A., et al. (2022). Neutralizing antibodies against the SARS-  
700 CoV-2 Delta and Omicron variants following heterologous CoronaVac plus BNT162b2  
701 booster vaccination. *Nat Med*.
- 702 Pettersen, E.F., Goddard, T.D., Huang, C.C., Meng, E.C., Couch, G.S., Croll, T.I., Morris, J.H.,  
703 and Ferrin, T.E. (2021). UCSF ChimeraX: Structure visualization for researchers,  
704 educators, and developers. *Protein Sci* 30, 70-82.
- 705 Planas, D., Saunders, N., Maes, P., Guivel-Benhassine, F., Planchais, C., Buchrieser, J.,  
706 Bolland, W.H., Porrot, F., Staropoli, I., Lemoine, F., et al. (2022). Considerable escape of  
707 SARS-CoV-2 Omicron to antibody neutralization. *Nature* 602, 671-675.

- 708 Qassim, S.H., Chemaitelly, H., Ayoub, H., AlMukdad, S., Tang, P., Hasan, M.R., Yassine, H.M.,  
709 Al-Khatib, H.A., Smatti, M.K., Abdul Rahim, H.F., et al. (2022). Effects of BA.1/BA.2  
710 subvariant, vaccination, and prior infection on infectiousness of SARS-CoV-2 Omicron  
711 infections. medRxiv.
- 712 Raybould, M.I.J., Kovaltsuk, A., Marks, C., and Deane, C.M. (2021). CoV-AbDab: the  
713 coronavirus antibody database. *Bioinformatics* 37, 734-735.
- 714 Robbiani, D.F., Gaebler, C., Muecksch, F., Lorenzi, J.C.C., Wang, Z., Cho, A., Agudelo, M.,  
715 Barnes, C.O., Gazumyan, A., Finkin, S., et al. (2020). Convergent antibody responses to  
716 SARS-CoV-2 in convalescent individuals. *Nature* 584, 437-442.
- 717 Schmidt, F., Muecksch, F., Weisblum, Y., Da Silva, J., Bednarski, E., Cho, A., Wang, Z., Gaebler,  
718 C., Caskey, M., Nussenzweig, M.C., et al. (2022). Plasma Neutralization of the SARS-CoV-2  
719 Omicron Variant. *N Engl J Med* 386, 599-601.
- 720 Shu, Y., and McCauley, J. (2017). GISAID: Global initiative on sharing all influenza data -  
721 from vision to reality. *Euro Surveill* 22.
- 722 Shuai, H., Chan, J.F., Hu, B., Chai, Y., Yuen, T.T., Yin, F., Huang, X., Yoon, C., Hu, J.C., Liu, H., et  
723 al. (2022). Attenuated replication and pathogenicity of SARS-CoV-2 B.1.1.529 Omicron.  
724 *Nature*.
- 725 Stothard, P. (2000). The sequence manipulation suite: JavaScript programs for analyzing  
726 and formatting protein and DNA sequences. *Biotechniques* 28, 1102, 1104.
- 727 Tiller, T., Meffre, E., Yurasov, S., Tsuiji, M., Nussenzweig, M.C., and Wardemann, H. (2008).  
728 Efficient generation of monoclonal antibodies from single human B cells by single cell RT-  
729 PCR and expression vector cloning. *J Immunol Methods* 329, 112-124.
- 730 Tseng, H.F., Ackerson, B.K., Luo, Y., Sy, L.S., Talarico, C.A., Tian, Y., Bruxvoort, K.J., Tubert,  
731 J.E., Florea, A., Ku, J.H., et al. (2022). Effectiveness of mRNA-1273 against SARS-CoV-2  
732 Omicron and Delta variants. *Nat Med*.
- 733 VanBlargan, L.A., Errico, J.M., Halfmann, P.J., Zost, S.J., Crowe, J.E., Jr., Purcell, L.A., Kawaoka,  
734 Y., Corti, D., Fremont, D.H., and Diamond, M.S. (2022). An infectious SARS-CoV-2 B.1.1.529  
735 Omicron virus escapes neutralization by therapeutic monoclonal antibodies. *Nat Med*.
- 736 Vanshylla, K., Di Cristanziano, V., Kleipass, F., Dewald, F., Schommers, P., Gieselmann, L.,  
737 Gruell, H., Schlotz, M., Ercanoglu, M.S., Stumpf, R., et al. (2021). Kinetics and correlates of  
738 the neutralizing antibody response to SARS-CoV-2 infection in humans. *Cell Host Microbe*  
739 29, 917-929 e914.
- 740 Vanshylla, K., Fan, C., Wunsch, M., Poopalasingam, N., Meijers, M., Kreer, C., Kleipass, F.,  
741 Ruchnewitz, D., Ercanoglu, M.S., Gruell, H., et al. (2022). Discovery of ultrapotent broadly  
742 neutralizing antibodies from SARS-CoV-2 elite neutralizers. *Cell Host Microbe* 30, 69-82  
743 e10.
- 744 Viana, R., Moyo, S., Amoako, D.G., Tegally, H., Scheepers, C., Althaus, C.L., Anyaneji, U.J.,  
745 Bester, P.A., Boni, M.F., Chand, M., et al. (2022). Rapid epidemic expansion of the SARS-  
746 CoV-2 Omicron variant in southern Africa. *Nature*.

- 747 Weinreich, D.M., Sivapalasingam, S., Norton, T., Ali, S., Gao, H., Bhore, R., Xiao, J., Hooper,  
748 A.T., Hamilton, J.D., Musser, B.J., et al. (2021). REGEN-COV Antibody Combination and  
749 Outcomes in Outpatients with Covid-19. *N Engl J Med* 385, e81.
- 750 Weissman, D., Alameh, M.G., de Silva, T., Collini, P., Hornsby, H., Brown, R., LaBranche, C.C.,  
751 Edwards, R.J., Sutherland, L., Santra, S., et al. (2021). D614G Spike Mutation Increases  
752 SARS CoV-2 Susceptibility to Neutralization. *Cell Host Microbe* 29, 23-31 e24.
- 753 Wratil, P.R., Stern, M., Priller, A., Willmann, A., Almanzar, G., Vogel, E., Feuerherd, M.,  
754 Cheng, C.C., Yazici, S., Christa, C., et al. (2022). Three exposures to the spike protein of  
755 SARS-CoV-2 by either infection or vaccination elicit superior neutralizing immunity to all  
756 variants of concern. *Nat Med*.
- 757 Yamasoba, D., Kimura, I., Nasser, H., Morioka, Y., Nao, N., Ito, J., Uriu, K., Tsuda, M.,  
758 Zahradnik, J., Shirakawa, K., et al. (2022). Virological characteristics of SARS-CoV-2 BA.2  
759 variant. medRxiv.
- 760 Ye, J., Ma, N., Madden, T.L., and Ostell, J.M. (2013). IgBLAST: an immunoglobulin variable  
761 domain sequence analysis tool. *Nucleic Acids Res* 41, W34-40.
- 762 Yuan, M., Liu, H., Wu, N.C., Lee, C.D., Zhu, X., Zhao, F., Huang, D., Yu, W., Hua, Y., Tien, H., et  
763 al. (2020). Structural basis of a shared antibody response to SARS-CoV-2. *Science* 369,  
764 1119-1123.
- 765 Zhang, Q., Ju, B., Ge, J., Chan, J.F., Cheng, L., Wang, R., Huang, W., Fang, M., Chen, P., Zhou, B.,  
766 et al. (2021). Potent and protective IGHV3-53/3-66 public antibodies and their shared  
767 escape mutant on the spike of SARS-CoV-2. *Nat Commun* 12, 4210.
- 768 Zhao, X., Li, D., Ruan, W., Chen, Z., Zhang, R., Zheng, A., Qiao, S., Zheng, X., Zhao, Y., Dai, L.,  
769 et al. (2022). Effects of a Prolonged Booster Interval on Neutralization of Omicron Variant.  
770 *N Engl J Med* 386, 894-896.
- 771

## Figure 1

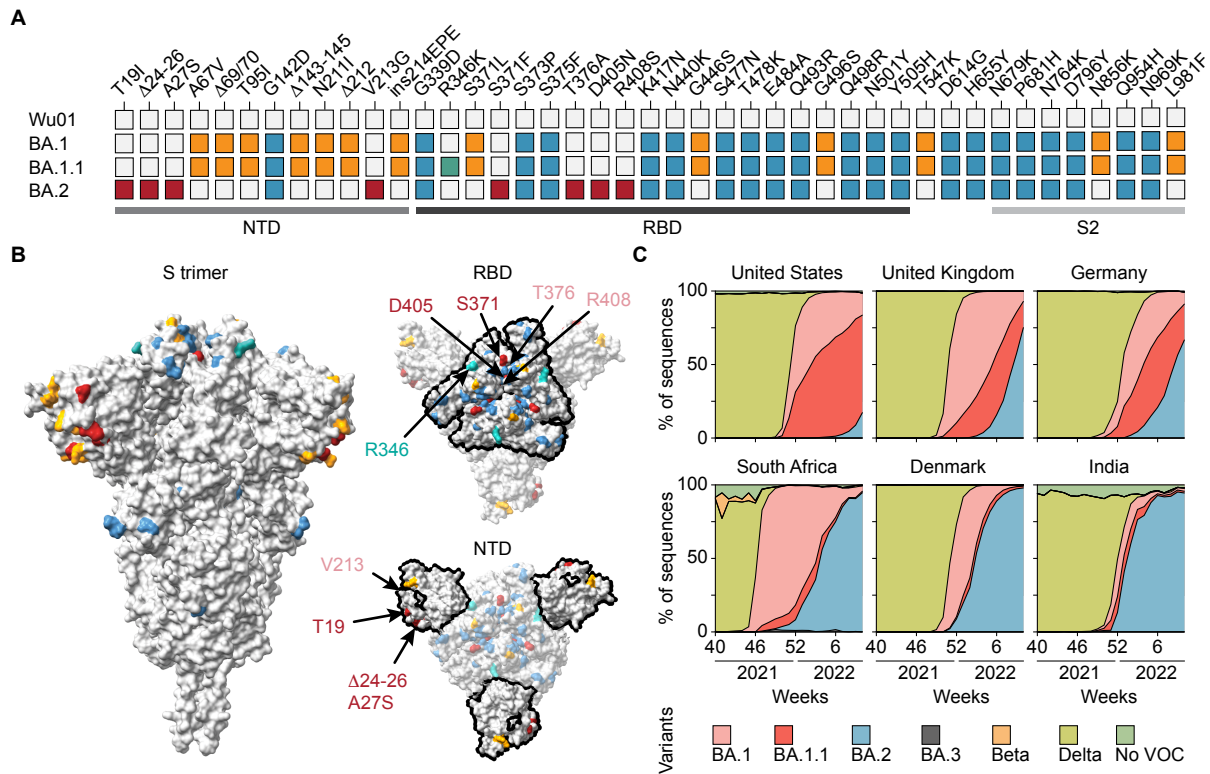

**Figure 1. Omicron sublineage differences.**

**(A)** Spike amino acid changes in the BA.1, BA.1.1, and BA.2 Omicron sublineages relative to Wu1. **(B)** Locations of changed amino acids in Omicron sublineages highlighted on the SARS-CoV-2 spike (PDB: 6XR8). Representations on the right show RBD and NTD outlined in black. Changes exclusive to BA.2 are indicated in dark red (visible on surface) and light red (not visible). In (A) and (B), mutations shared between BA.1 and BA.1.1 are shown in orange, mutations shared between BA.1, BA.1.1 and BA.2 are shown in blue, the R346K mutation exclusive to BA.1.1 is shown in green, and mutations exclusive to BA.2 are shown in red. **(C)** Proportion of sequences submitted to the GISAID SARS-CoV-2 database per variant and week (accessed on April 2, 2022). NTD, N-terminal domain; RBD, receptor-binding domain; PDB, Protein Data Bank.

## Figure 2

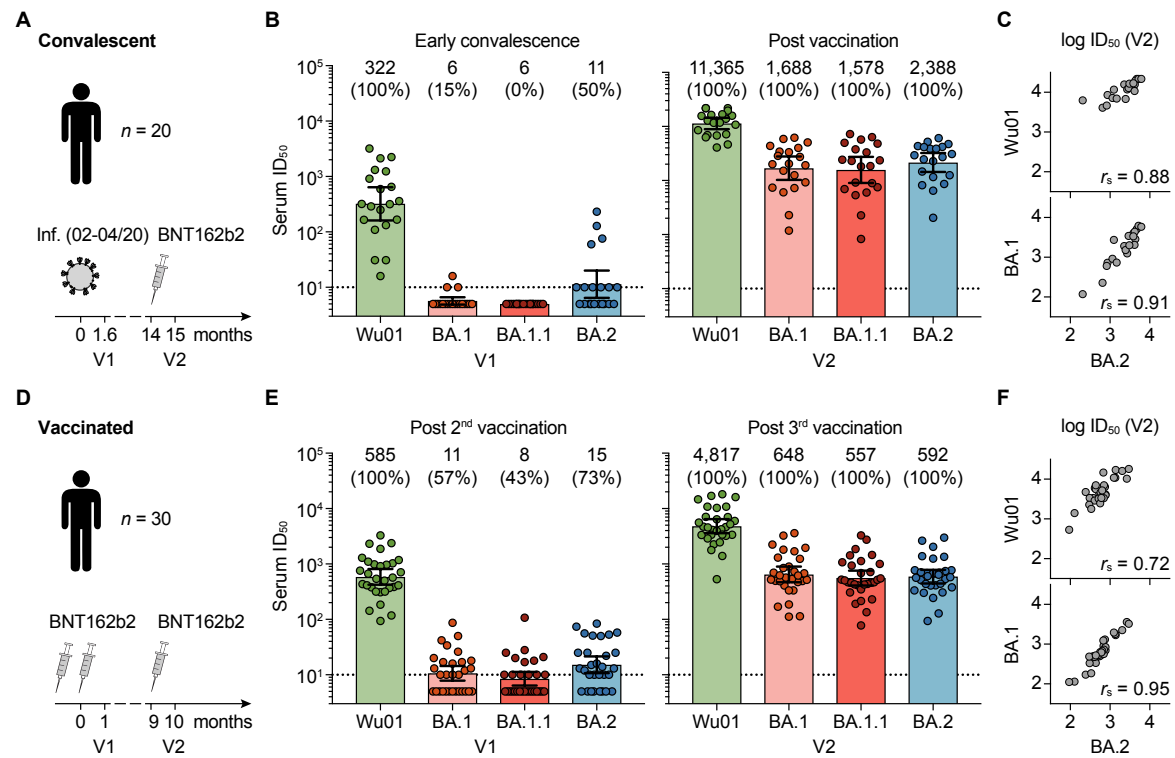

**Figure 2. Omicron sublineage-neutralizing serum activity in vaccinated and convalescent individuals.**

**(A)** Study scheme in COVID-19-convalescent individuals. Samples were collected after infection occurring between February and April, 2020 (V1), and after a BNT162b2 booster immunization (V2). **(B)** Fifty-percent inhibitory serum dilutions (ID<sub>50</sub>s) against Wu01, BA.1, BA.1.1, and BA.2 determined by pseudovirus neutralization assays in convalescent individuals. Bars indicate geometric mean ID<sub>50</sub>s with 95% confidence intervals (CIs) at V1 (left) and V2 (right). Numbers indicate geometric mean ID<sub>50</sub>s and percentage of individuals with detectable neutralizing activity (ID<sub>50</sub> > 10) in parentheses. **(C)** Correlation plots of log<sub>10</sub> serum ID<sub>50</sub>s against Wu01 (top) and BA.1 (bottom) versus BA.2 at V2 in convalescent individuals. *r<sub>s</sub>* indicates Spearman's rank correlation coefficients. **(D)** Study scheme in vaccinated individuals. Samples were collected after the second dose of BNT162b2 (V1) and after the third dose of BNT162b2 (V2). **(E)** Serum ID<sub>50</sub>s against Wu01, BA.1, BA.1.1, and BA.2 determined by pseudovirus neutralization assays in vaccinated individuals. Bars indicate geometric mean ID<sub>50</sub>s with 95% CIs at V1 (left) and V2 (right). Numbers indicate geometric mean ID<sub>50</sub>s and percentage of individuals with detectable neutralizing activity (ID<sub>50</sub> > 10) in parentheses. **(F)** Correlation plots of log<sub>10</sub> serum ID<sub>50</sub>s against Wu01 (top) and BA.1 (bottom) versus BA.2 at V2 in vaccinated individuals. *r<sub>s</sub>* indicates Spearman's rank correlation coefficients. In (B) and (E), ID<sub>50</sub>s below the lower limit of quantification (LLOQ, ID<sub>50</sub> of 10; indicated by black dotted lines) were imputed to ½ LLOQ (ID<sub>50</sub>=5). In (B) and (C), ID<sub>50</sub>s above the upper limit of quantification (21,870) were imputed to 21,871.

**Figure 3**

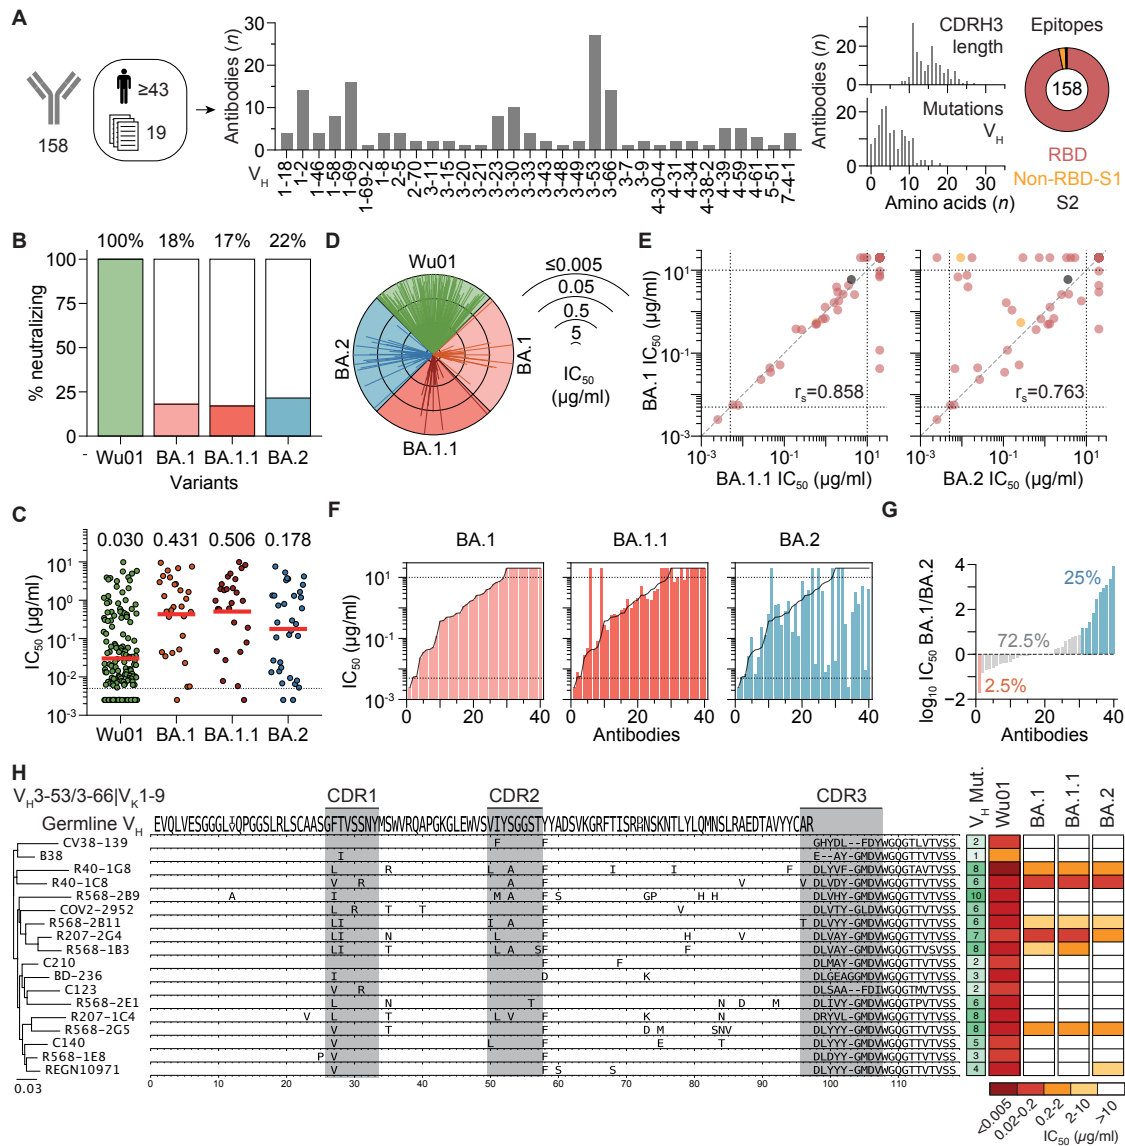

**Figure 3. Determining Omicron sublineage immune escape using monoclonal antibodies.**

**(A)** SARS-CoV-2-neutralizing monoclonal antibodies (n=158) derived from 19 studies and isolated from  $\geq 43$  convalescent individuals were analyzed. Bar charts indicate number of antibodies per heavy chain variable gene segment ( $V_H$ ), amino acid (aa) length of the heavy chain complementarity-determining region 3 (CDRH3), and number of  $V_H$  aa mutations relative to the  $V_H$  germline gene. Pie chart indicates antibody epitopes with slice sizes proportional to the number of antibodies. **(B)** Fraction of monoclonal antibodies neutralizing ( $IC_{50} < 10 \mu\text{g/ml}$ ) Wu01 (green), BA.1 (light red), BA.1.1 (dark red), and BA.2 (blue) in pseudovirus neutralization assay. **(C)**  $IC_{50}$ s of antibodies with neutralizing activity ( $IC_{50} < 10 \mu\text{g/ml}$ ) against the individual variants (Wu01, n=158; BA.1, n=29; BA.1.1, n=27; BA.2, n=34). Bars depict geometric mean  $IC_{50}$ s and dotted line indicates lower limit of quantification (LLOQ, 0.005  $\mu\text{g/ml}$ ). **(D)** Spider plot of  $IC_{50}$ s for all antibodies against Wu01, BA.1, BA.1.1, and BA.2. Antibodies are sorted arbitrarily but equally for each virus. **(E)** Correlation plots of  $IC_{50}$ s of all antibodies against BA.1.1 (left) and BA.2 (right) versus BA.1. Colors indicate epitopes as in (A). Dashed lines represent identity lines and dotted lines indicate limits of quantification. **(F)** Bar charts of antibodies with neutralizing activity ( $IC_{50} < 10 \mu\text{g/ml}$ ) against any Omicron sublineage (n=40). Antibodies in each chart are sorted by BA.1-neutralizing activity (black outline) and bars show  $IC_{50}$ s against indicated sublineages. Dotted lines show LLOQ (0.005  $\mu\text{g/ml}$ ) and upper limit of quantification (ULOQ; 10  $\mu\text{g/ml}$ ). **(G)** Ratio ( $\log_{10}$ ) of  $IC_{50}$ s against BA.1 and BA.2 for all neutralizing antibodies with any Omicron sublineage-neutralizing activity ( $IC_{50} < 10 \mu\text{g/ml}$ ; n=40). Ratios  $> 1 \log_{10}$  are highlighted in green and percentage of antibodies with ratio  $> 1 \log_{10}$  is indicated. In (E)-(G),  $IC_{50} < \text{LLOQ}$  were imputed to  $\frac{1}{2} \text{LLOQ}$  ( $IC_{50}=0.0025$ ) and  $IC_{50}$  values  $> \text{ULOQ}$  were imputed to  $2 \times \text{ULOQ}$  ( $IC_{50}=20$ ). **(H)** Phylogenetic tree and sequence alignment of antibodies of the  $V_H3-53/3-66|V_K1-9$  public clonotype. Letters indicate aa mutations relative to the  $V_H$  germline gene. Number of aa mutations compared to the corresponding germline allele and neutralizing activity against Wu01, BA.1, BA.1.1, and BA.2 are indicated on the right. Germline  $V_H$  represents the consensus of all identified germline alleles of depicted antibodies (VH3-53\*01, VH3-53\*04, and VH3-66\*01).



**Figure 4**

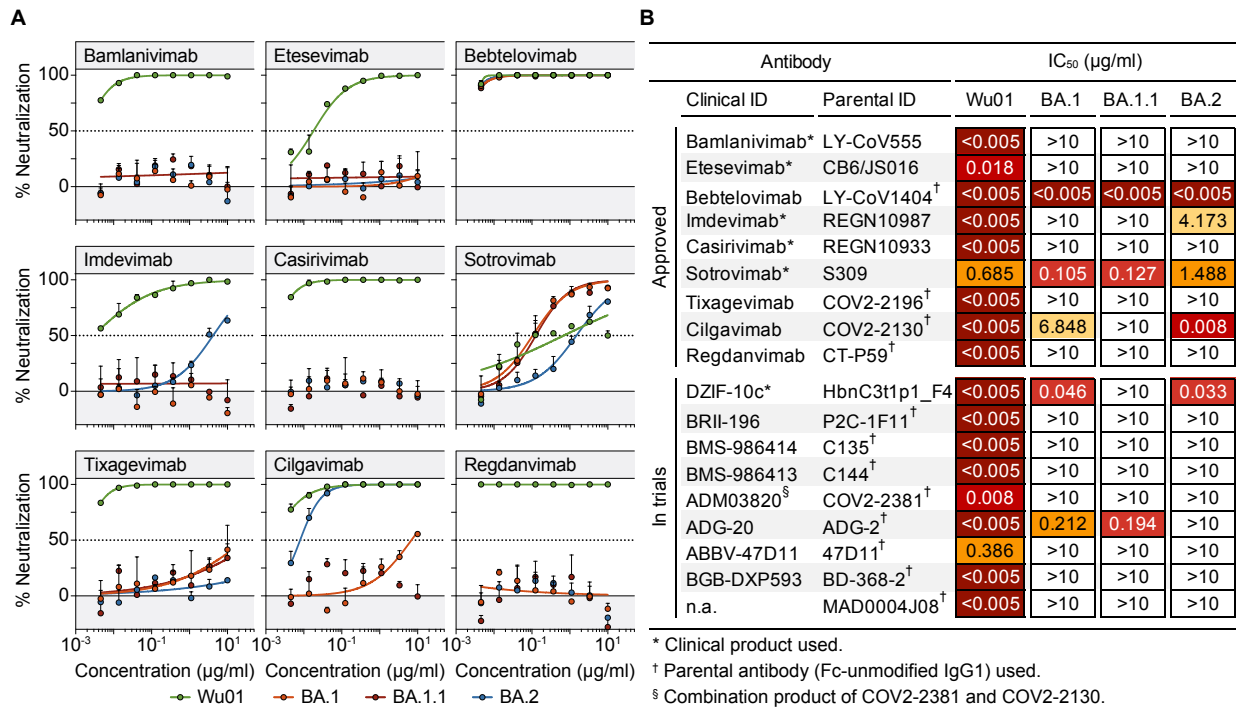

**Figure 4. Omicron sublineage-neutralizing activity of monoclonal antibodies in clinical use.**

(A) Dose response curves showing % neutralization of monoclonal antibodies against Wu01, BA.1, BA.1.1, and BA.2 in pseudovirus neutralization assay. Circles show averages and error bars indicate standard deviation. Dotted lines indicate 50% neutralization (IC<sub>50</sub>). (B) IC<sub>50</sub>s against Wu01, BA.1, BA.1.1, and BA.2 of monoclonal antibodies with current or previous authorization for clinical use or in clinical development. Symbols indicate whether clinical products or parental antibodies produced as human IgG1 were used.
